# Supplementary material for: A correction for sample overlap in genome-wide association studies in a polygenic pleiotropy-informed framework
Source: PubMed Central journal article supplement (PMC6019513; doi:10.1186/s12864-018-4859-7), 2018-06-25

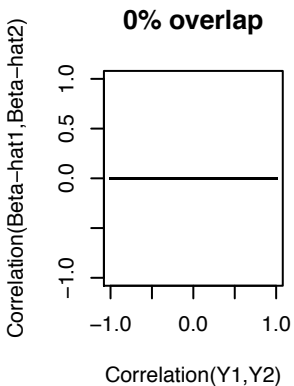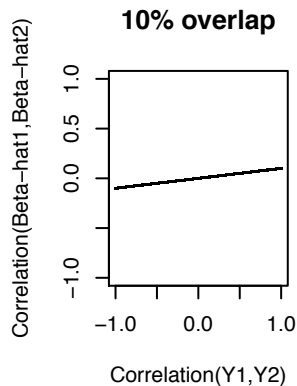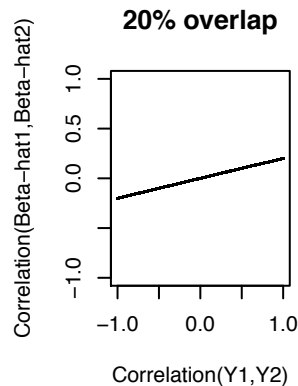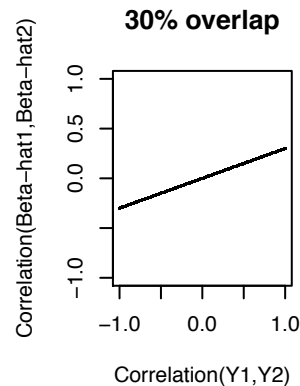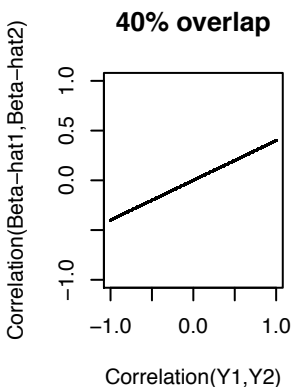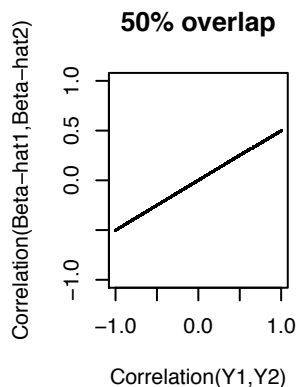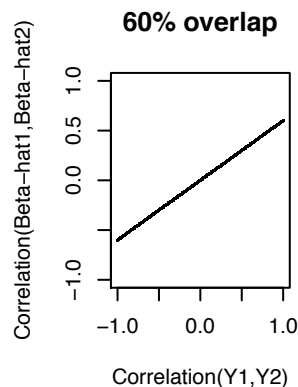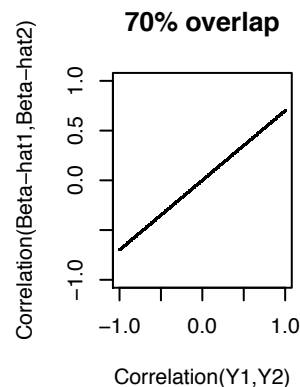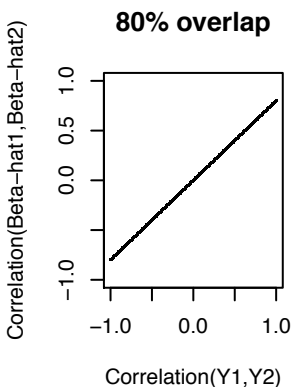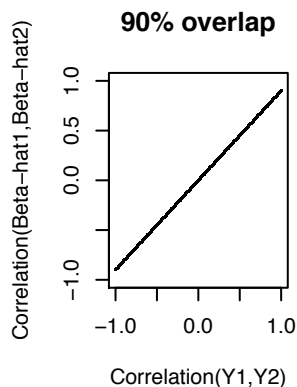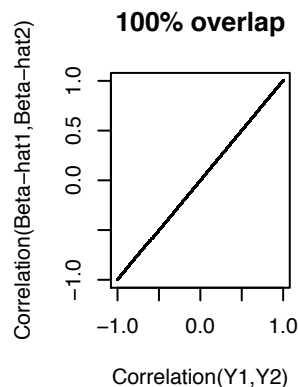

Supplement: 12864_2018_4859_MOESM1_ESM.pdf [file 12864_2018_4859_MOESM1_ESM.pdf]
